# Supplementary material
Source: PubMed Central journal article supplement (PMC5815916)

**A**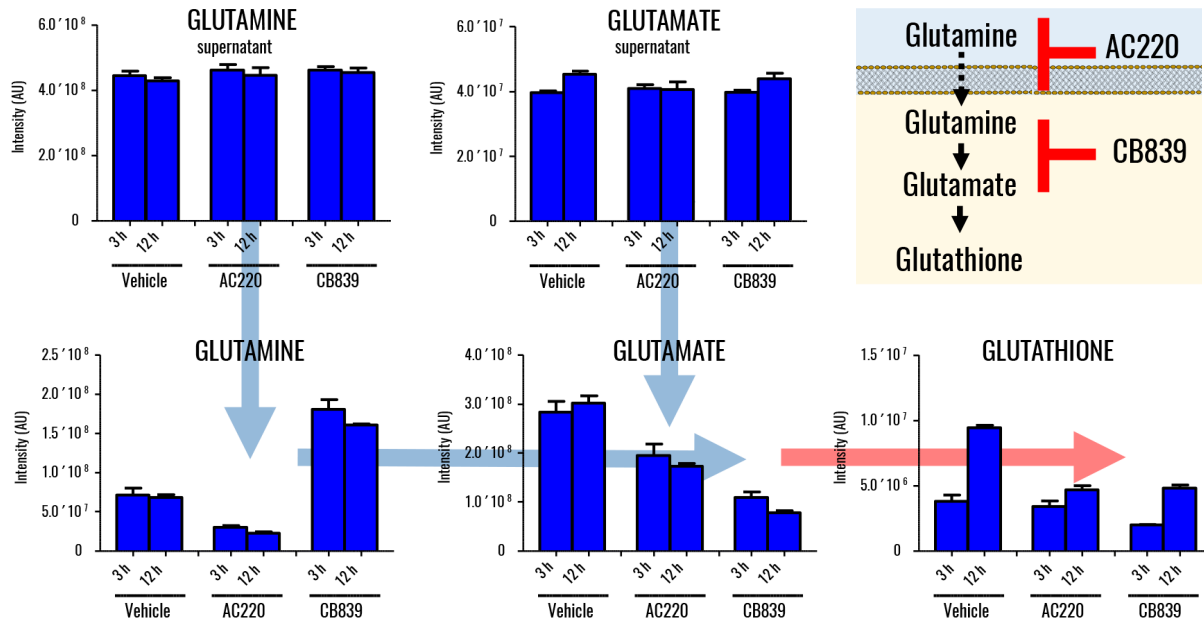**B**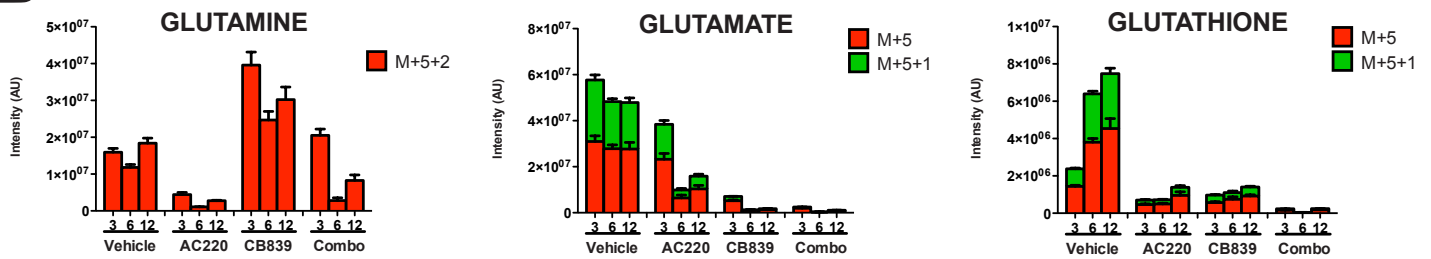**C**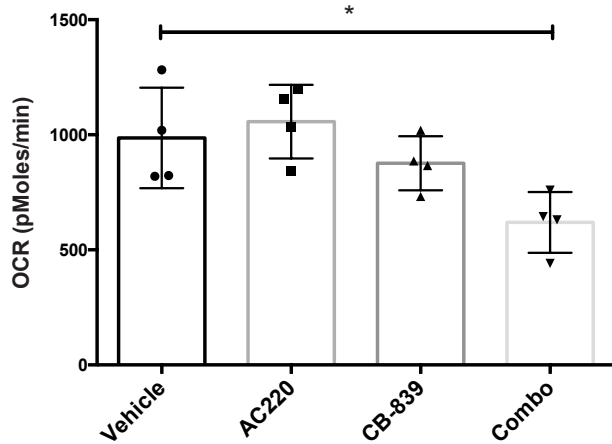**D**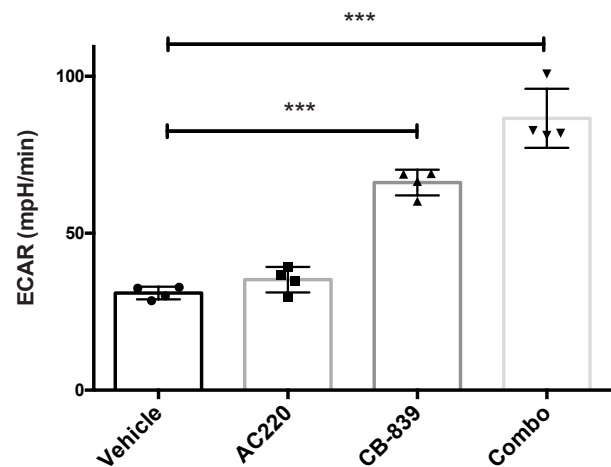

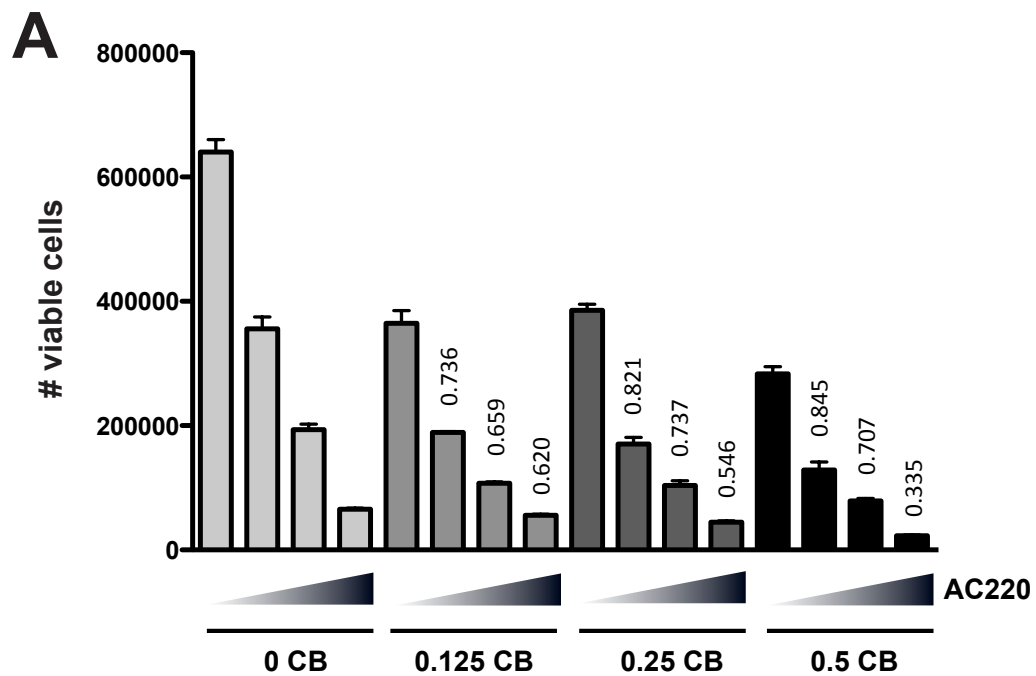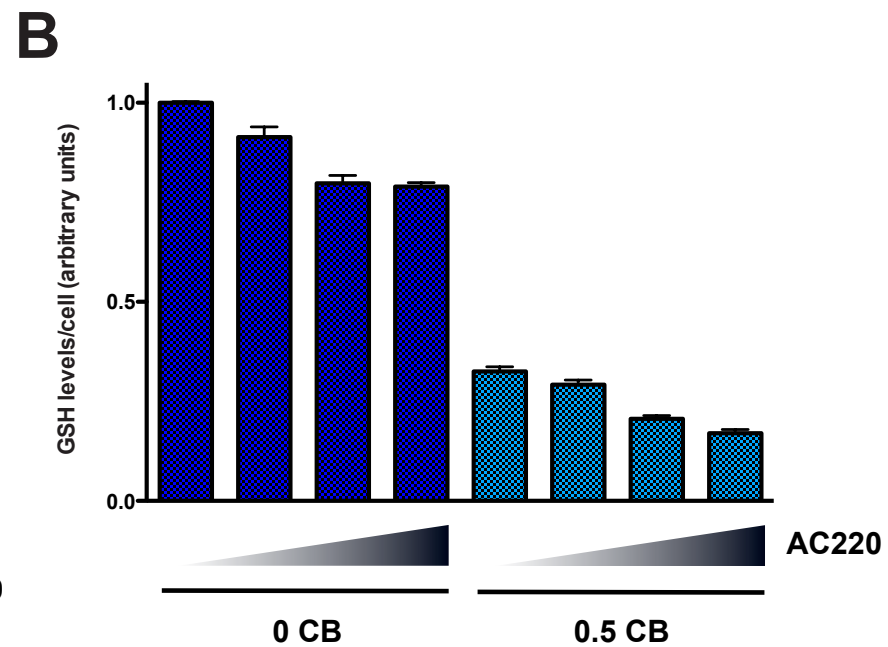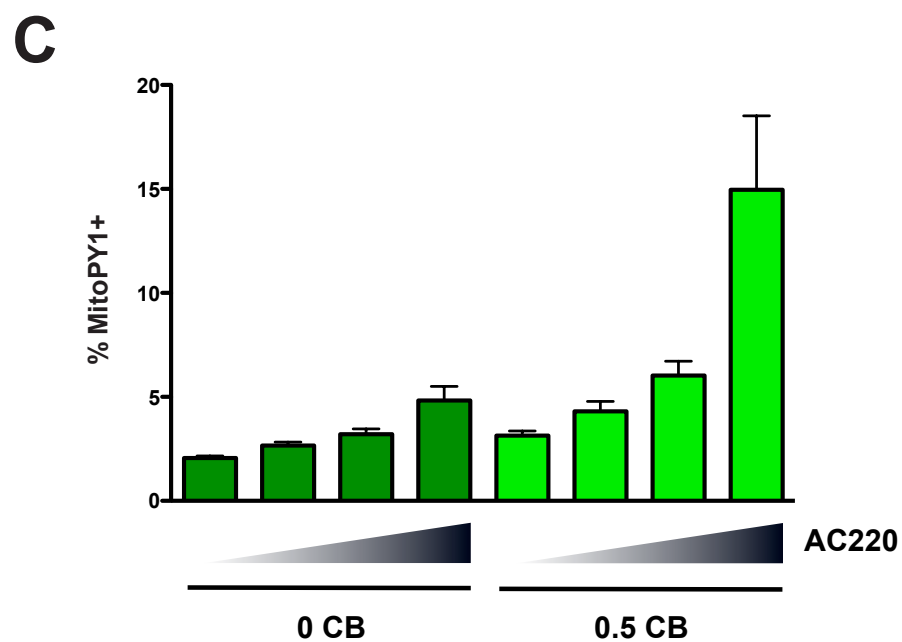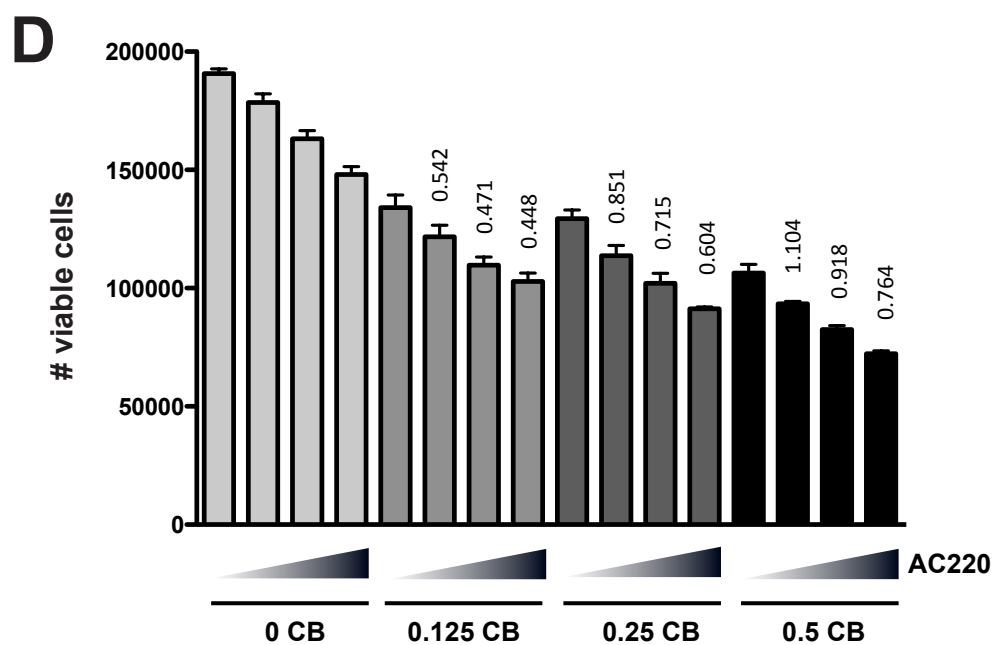

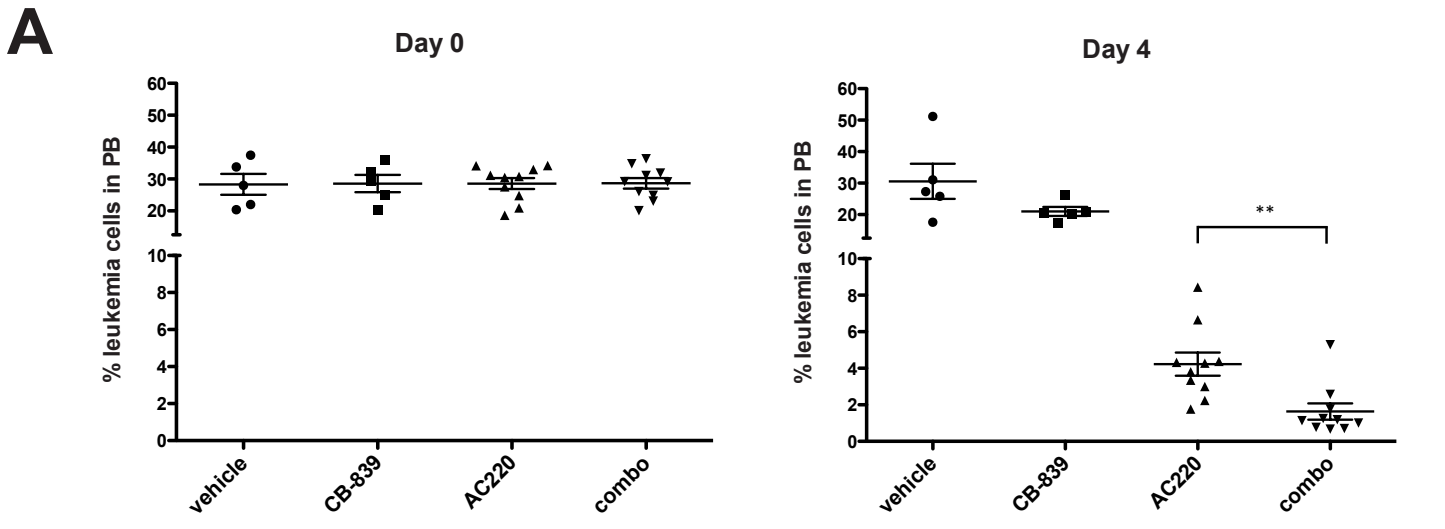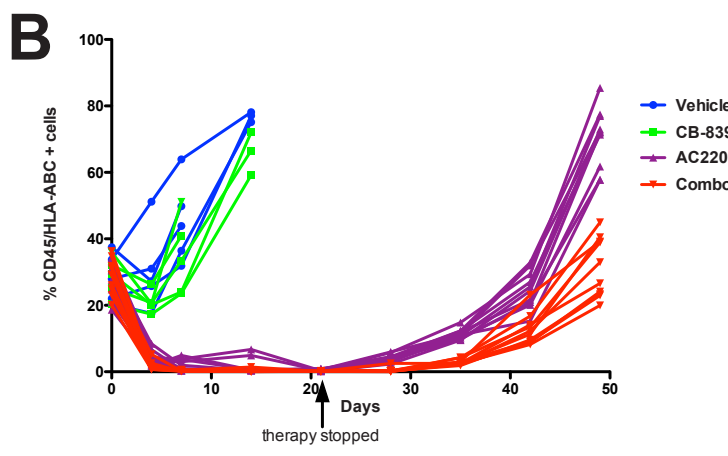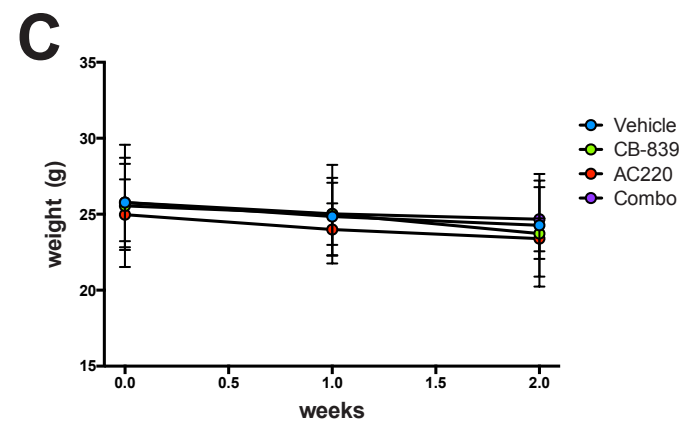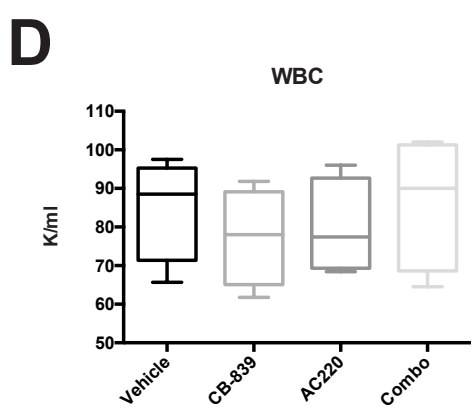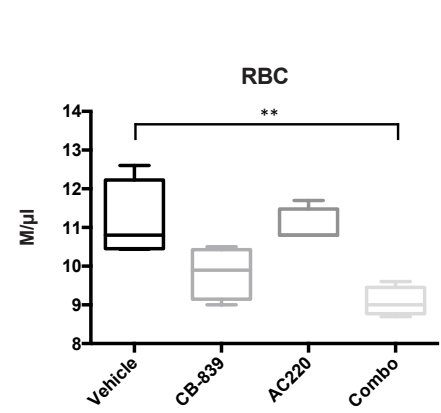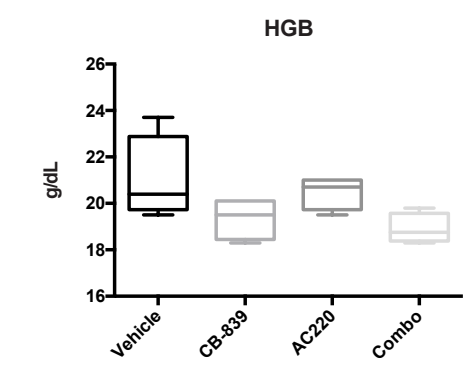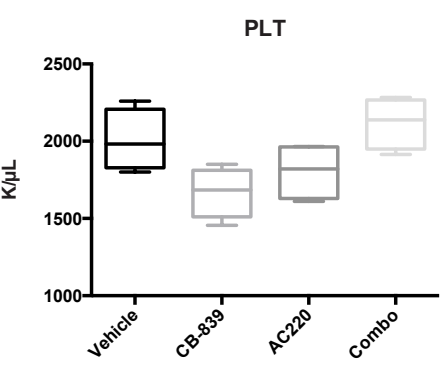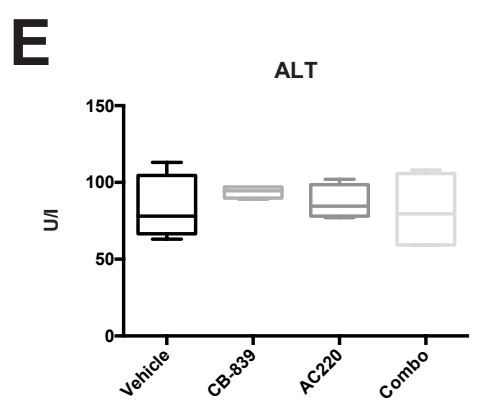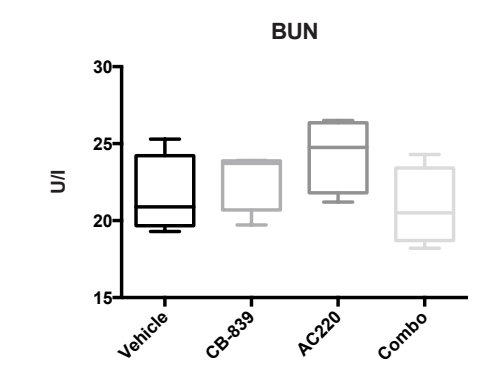

Supplement: NIHMS918134-supplement-1.pdf [file NIHMS918134-supplement-1.pdf]
